# Supplementary material
Source: ML conference proceedings conference paper supplement (https://www.ecva.net/papers/eccv_2020/papers_ECCV/html/123530324_ECCV_2020_paper.php)
Supplement: Supplementary file 3 [file 123530324-supp.zip]

Archive with 20 entries (15 files):
- 0575-supp/
- 0575-supp/.DS_Store
- __MACOSX/
- __MACOSX/0575-supp/
- __MACOSX/0575-supp/._.DS_Store
- 0575-supp/0575-supp.pdf
- __MACOSX/0575-supp/._0575-supp.pdf
- 0575-supp/eccv_main.m
- __MACOSX/0575-supp/._eccv_main.m
- 0575-supp/video_results/
- 0575-supp/video_results/.DS_Store
- __MACOSX/0575-supp/video_results/
- __MACOSX/0575-supp/video_results/._.DS_Store
- 0575-supp/video_results/Sunset.mp4
- __MACOSX/0575-supp/video_results/._Sunset.mp4
- 0575-supp/video_results/Sea.mp4
- __MACOSX/0575-supp/video_results/._Sea.mp4
- 0575-supp/video_results/Sky.mp4
- __MACOSX/0575-supp/video_results/._Sky.mp4
- __MACOSX/0575-supp/._video_results
