# Supplementary material
Source: ML conference proceedings conference paper supplement (https://www.ecva.net/papers/eccv_2020/papers_ECCV/html/123530324_ECCV_2020_paper.php)
Supplement: Supplementary file 3 [file 123530324-supp.zip › 0575-supp/eccv_main.m]

clear;
ratings = [
2 2 2 4 1 4 1 4 1 1 1 1 1 1 1 1 1 2 1 2
3 2 4 4 2 3 2 3 1 2 1 2 3 2 4 3 1 3 2 2
1 2 3 2 1 3 1 2 1 1 1 1 1 1 2 2 1 3 1 2
5 5 5 5 3 5 5 4 5 4 4 5 5 5 4 5 5 4 2 5
3 4 4 3 3 3 4 3 3 3 3 3 3 2 3 3 3 2 3 3
3 4 5 5 3 5 5 3 5 4 3 5 4 4 4 3 4 3 2 4
5 2 3 5 3 3 2 4 3 2 1 1 2 2 2 4 1 1 1 3
3 3 4 5 3 3 2 3 3 2 3 2 3 2 3 4 2 1 2 2
3 3 4 3 3 4 2 3 3 2 2 1 2 2 3 5 2 1 1 3
4 4 5 5 4 5 5 5 4 3 3 5 4 5 3 5 2 3 5 5
2 4 4 3 3 3 4 5 3 3 3 3 4 2 2 4 2 3 4 3
2 4 5 5 3 5 5 4 5 3 3 5 5 4 4 5 2 3 5 4
1 1 1 2 2 1 2 1 1 3 1 1 1 1 2 1 1 1 1 1
2 3 1 2 4 3 2 1 2 3 3 4 4 2 4 2 3 3 1 1
2 1 1 1 3 1 2 1 1 3 2 3 1 1 3 4 1 1 1 1
5 2 3 5 5 2 4 4 4 5 4 2 2 5 3 4 4 4 4 4
1 3 3 3 3 2 3 3 2 3 2 2 4 3 2 4 4 3 3 3
3 2 3 4 3 2 4 3 3 4 4 2 2 4 2 4 4 3 3 3
4 1 1 4 1 2 2 2 2 4 2 2 2 2 2 2 2 3 2 1
3 3 1 3 3 4 2 2 3 4 3 3 3 2 3 2 2 4 1 1
4 1 1 3 2 2 2 2 2 4 2 3 3 2 2 2 2 3 1 1
4 3 1 3 5 3 3 3 3 4 3 4 3 4 3 3 3 3 3 3
2 3 1 4 4 2 4 3 3 4 4 4 4 3 2 3 2 3 4 3
4 3 1 3 4 3 3 2 3 4 3 4 4 4 2 3 3 3 4 3
3 1 4 2 1 1 2 1 2 2 2 1 1 1 2 2 2 2 1 1
3 4 4 2 3 1 1 3 1 5 4 3 2 4 4 2 5 1 4 4
3 3 2 2 2 1 2 2 2 3 3 2 1 3 2 1 3 1 2 3
5 5 5 3 3 4 4 3 3 3 3 4 4 4 4 4 4 4 4 2
3 2 3 2 1 3 1 1 1 1 1 3 1 1 4 3 1 4 5 1
4 3 3 2 2 3 3 1 2 2 2 3 2 2 4 3 2 4 4 1
5 1 5 2 2 1 2 1 2 3 2 3 3 1 2 3 3 2 1 2
3 4 3 2 1 1 1 3 5 2 1 3 1 1 4 2 2 1 4 1
4 3 3 2 1 1 2 2 3 2 1 3 1 1 2 2 2 1 2 1
5 5 5 5 5 5 5 5 5 5 5 5 5 5 5 5 5 5 5 5
3 2 5 5 5 5 5 5 4 5 5 5 4 4 4 5 4 5 5 5
4 3 5 5 5 5 5 5 5 5 5 5 5 5 5 5 5 5 5 5
2 2 3 4 4 1 2 3 2 2 2 2 2 4 1 1 2 2 1 2
2 2 4 2 4 3 4 3 4 2 2 4 2 4 3 2 2 2 1 3
2 2 2 3 4 2 3 3 2 2 2 4 3 4 2 1 2 2 2 2
4 3 4 4 3 3 4 4 4 4 2 3 2 4 2 4 4 4 2 4
2 2 4 3 3 2 3 3 4 3 2 3 3 4 2 4 4 3 1 3
3 3 4 3 2 3 4 4 4 4 2 3 2 4 2 3 4 4 2 4
2 2 4 4 2 1 3 3 2 2 2 3 3 4 2 4 2 2 2 2
4 2 4 2 4 2 3 3 4 3 2 4 2 4 3 3 2 3 2 3
3 2 3 3 3 2 3 3 2 2 2 4 3 4 4 4 2 2 2 2
4 3 4 4 2 1 4 2 4 4 3 3 3 4 3 2 4 4 3 4
3 2 4 3 2 3 4 4 4 3 2 3 4 4 3 3 3 3 2 3
4 3 4 3 2 2 4 3 4 4 3 3 3 4 3 2 4 4 3 4
2 2 1 1 1 1 2 1 3 2 2 3 1 2 1 1 3 1 4 1
2 3 2 3 2 3 2 3 4 3 2 3 1 3 1 3 4 1 5 3
1 2 1 1 1 1 2 1 3 1 1 2 1 2 1 1 3 1 5 1
5 2 3 5 3 5 5 5 5 5 5 5 3 5 5 5 5 5 5 5
4 3 4 3 4 5 4 3 5 3 4 3 3 5 3 4 4 5 3 4
4 3 3 4 3 5 4 4 5 4 4 4 3 5 4 5 4 5 4 5
4 4 3 4 3 5 4 5 3 4 3 3 1 1 3 5 2 2 5 5
3 5 3 4 3 4 3 5 4 4 3 3 1 3 3 5 4 2 3 4
2 5 2 4 3 4 3 5 3 4 3 2 1 1 3 5 2 2 4 4
5 4 4 5 5 5 5 5 5 4 5 5 4 5 4 4 5 4 5 5
3 4 4 3 4 4 4 4 3 3 4 3 4 5 4 5 4 4 3 4
4 4 4 3 5 4 4 4 4 3 4 4 4 5 4 5 4 4 4 4
2 2 2 2 3 2 5 1 2 2 1 1 2 1 1 1 1 2 1 1
4 4 3 3 5 2 5 3 3 2 2 2 3 3 5 2 4 1 2 1
3 3 3 3 4 2 5 2 2 2 1 1 2 1 2 1 2 1 1 1
4 5 5 5 5 4 5 3 4 5 5 4 5 5 4 3 4 5 5 5
2 3 3 5 3 1 4 5 3 5 5 2 5 5 5 2 3 3 4 2
3 4 4 5 4 2 4 4 3 5 5 3 5 5 4 2 3 4 4 3
2 2 5 5 2 2 5 4 3 4 2 2 4 1 5 2 2 5 2 1
4 3 4 5 3 3 4 4 5 5 4 5 5 4 4 2 1 2 1 4
3 3 4 5 3 2 4 4 3 4 3 3 4 2 4 2 1 3 1 2
4 3 5 5 5 5 4 5 5 5 5 2 4 4 4 4 4 5 4 5
4 3 3 2 4 4 4 5 5 4 5 3 3 5 5 4 4 2 5 1
4 3 4 3 5 4 4 5 5 4 5 3 3 4 4 4 4 3 4 2
1 3 1 5 1 5 2 1 2 1 2 4 1 1 1 3 2 1 1 1
5 4 2 4 3 4 3 2 4 2 4 3 4 1 3 5 4 2 2 2
3 2 1 4 2 3 3 1 3 1 3 3 3 1 1 4 2 1 1 1
5 5 5 5 3 5 3 5 5 5 4 5 4 3 5 5 5 3 3 5
3 2 4 2 3 1 2 5 3 2 4 4 3 3 3 4 4 2 5 3
4 2 5 3 2 3 3 5 4 3 4 4 4 3 3 4 4 3 4 4
3 3 5 5 2 5 3 3 3 2 3 5 2 1 5 5 3 2 3 2
1 3 5 5 5 3 4 3 3 2 5 2 2 1 4 3 4 4 3 5
3 2 4 4 4 4 5 3 3 2 3 3 2 1 5 4 3 2 3 3
5 5 3 5 5 5 1 5 5 5 4 4 4 5 3 5 5 5 5 4
3 2 3 3 2 2 1 5 2 2 3 2 3 2 5 3 4 2 4 2
3 3 3 3 3 3 1 5 2 3 4 3 4 4 4 4 5 4 5 3
1 1 1 1 1 1 1 1 1 1 1 1 1 1 1 1 2 1 1 1
3 3 1 5 1 4 3 5 4 1 3 3 1 3 3 4 4 1 4 2
1 1 1 1 1 1 1 1 1 1 1 1 1 1 1 1 2 1 1 1
2 2 5 5 5 5 5 4 5 5 2 5 3 4 4 4 3 5 4 3
1 1 4 4 2 1 3 1 5 3 1 3 1 3 2 5 4 1 4 2
1 1 3 5 4 4 3 4 4 4 2 4 2 4 4 5 2 3 4 2
2 3 1 1 2 1 1 1 1 2 1 1 1 3 1 4 1 1 1 1
1 2 1 4 3 2 5 4 2 2 1 1 1 3 3 4 3 2 3 3
1 1 1 1 3 1 2 2 1 1 1 1 1 2 1 3 1 1 1 1
3 1 5 5 5 2 5 4 1 3 2 4 3 5 5 5 4 4 5 1
1 1 3 5 2 2 2 2 2 3 1 5 2 4 3 4 3 4 3 2
2 1 5 5 4 2 3 4 1 3 2 4 4 5 4 3 4 3 5 2
2 3 2 2 3 2 2 5 3 4 1 2 2 1 2 1 2 3 1 1
3 5 4 3 3 4 3 5 4 5 1 4 5 4 3 3 5 3 4 5
2 4 3 2 3 3 2 5 3 4 1 3 3 1 1 2 2 3 2 2
5 5 5 5 5 5 3 5 4 5 5 5 5 5 5 5 5 5 5 5
3 4 4 4 5 4 4 3 4 5 4 3 3 5 4 4 3 4 3 4
4 4 4 4 5 4 3 4 4 5 4 3 3 5 4 4 4 4 4 5
4 4 3 2 4 3 3 4 4 5 2 3 4 2 4 2 3 4 3 3
3 5 4 4 3 3 4 4 5 5 1 4 3 3 2 2 3 4 3 4
3 5 3 2 3 3 3 4 4 5 1 3 3 2 3 2 3 4 3 3
5 5 4 5 5 5 4 5 4 5 5 4 4 3 5 3 5 5 5 5
2 5 4 4 5 5 4 4 3 4 3 5 5 3 5 4 5 5 4 4
3 5 3 5 5 5 4 4 3 4 3 4 4 3 5 3 5 5 5 4
3 2 2 3 2 3 2 2 4 5 3 3 4 3 4 2 3 2 3 5
5 5 5 4 3 5 4 5 5 5 5 5 5 5 4 4 5 4 4 5
3 2 4 3 3 4 3 3 4 5 4 4 4 4 4 3 4 4 3 5
5 4 5 4 5 5 5 5 5 4 5 3 5 4 5 5 5 4 5 3
2 3 3 3 5 3 2 2 2 4 3 3 3 4 2 2 3 2 5 3
2 4 3 2 5 3 3 3 2 4 3 3 3 3 2 3 3 3 5 3
3 3 4 5 3 4 3 4 3 5 4 4 4 4 4 3 4 2 3 5
4 3 4 5 4 3 4 5 4 4 4 4 4 4 5 5 4 3 5 3
4 3 5 5 4 3 4 5 4 5 4 4 4 4 5 5 4 3 3 4
5 5 5 5 4 3 3 5 4 5 4 5 5 4 3 4 5 3 4 4
4 4 2 4 4 4 3 3 3 4 3 4 4 3 4 3 3 3 3 3
5 5 2 4 4 4 3 4 3 4 3 5 4 3 3 4 3 4 4 4
2 4 2 4 1 1 1 1 1 2 1 1 2 1 1 3 2 1 2 4
5 2 4 2 1 3 3 1 2 2 3 4 4 2 3 4 4 2 4 4
3 2 3 3 1 2 2 1 2 2 1 2 3 2 2 4 3 2 4 4
5 4 5 3 4 4 4 4 4 4 4 4 4 4 3 4 4 3 5 5
5 5 3 4 2 2 1 4 1 2 3 3 3 4 3 2 3 3 2 2
5 5 4 3 2 3 2 4 2 3 2 3 3 4 3 3 4 4 2 3
4 4 5 4 2 3 1 1 1 3 1 3 3 3 1 4 2 1 2 5
4 2 3 3 2 5 1 1 2 2 3 3 4 3 3 2 4 2 2 2
4 2 4 5 2 4 1 1 2 2 1 4 3 3 2 3 3 2 2 3
4 3 5 3 5 4 4 4 3 3 5 4 4 4 5 4 4 3 5 5
4 5 3 4 4 4 5 2 3 4 5 3 3 3 3 2 3 2 5 4
4 4 4 3 4 4 5 3 3 4 5 3 3 3 4 3 4 3 5 5
2 3 2 2 2 2 3 1 3 2 1 5 1 3 1 1 2 2 3 1
2 4 3 3 3 4 4 2 4 2 2 5 3 4 3 2 4 4 3 3
2 3 3 2 2 2 3 2 3 2 1 4 2 3 1 1 2 2 4 2
5 3 3 5 2 3 4 1 4 4 2 5 4 4 3 2 5 5 5 3
5 2 2 4 3 4 4 2 4 3 3 5 2 4 3 2 3 3 1 1
5 2 1 4 2 2 4 3 4 3 3 5 4 4 3 2 2 4 3 1
1 3 2 1 4 2 4 2 4 4 1 5 2 2 1 4 3 3 5 1
2 2 2 1 3 4 4 4 4 4 3 5 4 3 2 4 4 4 1 3
1 2 2 1 3 3 4 3 4 4 2 4 2 4 1 4 3 3 4 1
3 3 3 3 4 4 4 4 4 4 2 5 4 4 4 3 2 5 5 3
3 4 2 2 2 3 4 4 4 3 2 5 3 3 4 3 3 4 1 1
3 4 2 3 4 4 4 2 4 3 3 4 4 3 4 3 3 3 3 2
1 3 1 3 3 3 3 4 3 3 2 3 2 2 2 2 2 2 2 3
4 4 4 4 3 4 3 4 3 3 2 4 4 3 4 3 1 3 4 4
1 3 2 3 3 4 3 3 3 3 2 4 3 3 2 2 2 3 3 3
3 4 4 5 5 4 5 5 5 5 4 5 4 5 5 5 5 5 5 5
4 4 4 5 5 5 5 4 5 4 2 3 4 3 4 2 3 3 3 4
3 4 5 5 5 5 5 4 5 4 4 4 5 4 5 5 3 4 4 5
3 4 1 3 3 5 4 4 3 3 2 3 2 3 2 4 4 2 2 2
5 4 4 3 5 4 3 4 4 3 2 2 4 5 4 2 3 3 3 4
3 4 2 3 3 4 3 3 3 3 2 3 3 4 2 4 4 3 3 3
5 5 5 5 5 4 5 5 5 5 4 5 4 4 5 4 5 5 5 5
4 4 2 3 5 4 4 5 5 5 3 4 3 4 4 2 3 4 4 4
5 5 3 4 5 4 4 5 5 5 4 5 4 4 5 4 4 5 5 4
2 1 4 4 3 5 3 2 2 2 3 1 3 1 4 3 1 3 1 1
2 4 4 4 3 4 3 3 4 4 5 3 2 3 3 3 2 4 1 4
2 2 4 3 2 4 2 2 2 1 3 1 1 1 3 3 1 4 1 2
5 5 5 5 5 4 4 4 4 5 5 5 5 4 5 5 4 5 5 5
3 1 2 3 4 4 3 4 4 2 4 4 3 3 3 3 5 3 3 5
4 2 2 4 4 4 3 4 3 3 4 4 4 3 4 4 4 5 4 5
1 2 4 3 5 4 2 2 4 3 5 3 2 2 3 5 1 4 3 5
2 3 5 3 4 4 3 3 4 3 5 3 2 3 3 4 2 3 3 5
2 2 5 2 4 4 2 2 3 2 5 2 1 1 2 5 1 4 3 5
5 4 5 5 5 5 4 5 5 5 5 5 2 5 5 5 5 5 5 5
3 4 3 4 4 5 5 5 4 3 4 5 2 5 3 3 4 4 3 4
4 3 3 4 4 5 5 5 5 4 5 5 1 5 3 4 5 5 4 4
1 1 1 1 5 3 1 2 1 4 2 1 5 1 2 3 2 1 1 2
1 3 2 3 4 4 1 3 2 4 3 1 4 3 3 3 4 3 3 3
2 2 3 2 4 3 1 3 1 4 3 1 4 2 3 3 2 2 2 3
5 5 5 5 5 5 5 5 4 4 5 5 5 3 3 5 4 5 5 4
5 5 1 3 3 5 4 3 2 3 4 5 5 4 4 5 4 5 5 3
5 5 3 4 4 5 4 5 3 3 4 5 5 4 4 5 4 5 5 3
3 4 1 3 3 4 2 5 1 5 2 2 5 1 4 2 3 3 3 1
4 3 2 3 2 4 1 3 2 4 2 5 4 4 4 3 4 3 4 4
3 4 2 3 2 4 1 4 2 4 1 3 4 1 4 3 3 3 4 4
5 4 5 5 4 4 5 3 4 4 3 4 5 4 5 4 5 5 4 5
5 3 4 5 2 4 3 3 4 4 3 5 4 3 5 4 4 5 5 4
5 4 4 4 4 4 3 3 4 4 3 5 4 4 5 4 5 5 4 4
3 3 3 1 2 2 2 2 3 3 1 2 3 2 3 2 5 2 1 2
3 4 4 2 5 4 5 4 5 4 3 4 4 4 4 2 5 5 1 5
2 4 3 1 3 2 3 2 3 3 2 2 2 2 3 1 5 3 1 2
5 4 4 3 5 5 3 5 4 5 4 5 5 5 4 5 5 5 5 5
5 3 4 3 3 4 5 5 5 4 3 4 4 2 4 5 1 5 5 5
5 4 4 3 4 4 4 5 5 5 4 5 4 4 5 5 2 5 5 5
5 2 3 1 3 3 4 3 4 3 1 3 4 2 5 3 5 3 5 5
5 4 5 2 4 4 5 4 5 4 3 4 4 4 4 5 2 5 5 5
5 3 3 1 4 3 5 4 4 3 2 3 2 2 5 3 2 5 5 5
5 4 4 3 5 5 4 5 5 5 4 5 5 2 5 5 5 5 5 5
5 4 3 3 3 4 5 5 5 4 3 4 4 2 4 5 1 5 5 5
5 4 4 3 4 4 4 4 5 5 4 5 4 2 5 5 2 5 5 5
2 4 5 3 5 3 1 3 1 2 1 5 1 5 1 1 1 3 3 1
5 5 3 5 5 4 5 5 5 5 4 3 5 5 5 4 3 4 4 5
4 5 3 3 5 3 1 3 2 2 1 3 1 5 2 1 1 2 4 1
5 5 5 5 5 5 5 5 5 5 5 5 5 5 5 5 2 5 5 5
1 4 5 3 5 5 2 3 1 4 3 3 4 2 4 3 2 5 4 4
2 3 5 4 5 4 3 4 3 5 4 4 4 3 5 4 2 5 5 5
3 5 5 5 5 5 5 5 3 4 2 5 4 5 2 2 3 2 5 2
2 3 4 4 4 5 3 5 3 5 5 5 3 3 5 5 3 3 4 4
3 4 4 5 4 5 4 5 4 5 1 5 3 3 2 2 2 2 5 1
5 5 5 5 5 5 5 3 4 5 2 5 5 5 3 4 5 4 5 5
1 3 5 3 4 5 4 2 2 4 2 5 5 4 4 3 2 3 3 2
3 4 5 4 4 4 5 2 3 5 2 5 5 4 3 3 3 3 4 3
2 1 2 1 1 2 1 2 1 1 1 1 1 2 1 1 1 1 1 1
2 2 2 1 2 2 2 1 1 2 2 2 2 2 2 2 2 2 1 3
1 1 2 1 1 1 2 1 1 2 1 1 2 2 2 2 2 1 1 1
3 2 3 3 5 3 3 4 5 3 4 1 3 4 3 3 2 3 2 3
4 2 3 4 4 2 3 2 4 2 3 2 3 3 4 3 3 3 2 2
3 3 4 4 4 3 3 3 4 3 2 1 3 4 4 4 2 3 3 3
4 1 3 2 3 3 3 2 2 2 3 2 2 4 2 1 2 2 2 1
3 2 3 2 3 3 2 1 3 2 3 3 2 3 3 2 2 3 2 3
3 1 3 3 2 2 3 1 2 2 2 3 2 4 3 3 2 2 2 1
3 3 3 3 4 3 3 4 5 3 4 2 3 4 4 3 2 2 2 3
3 2 2 3 5 3 3 3 3 2 3 2 3 3 4 3 3 3 2 2
2 3 3 3 5 4 3 4 4 2 3 1 4 3 4 4 2 3 3 2
1 1 3 5 1 3 4 4 1 5 2 1 2 1 1 3 1 3 3 1
1 1 2 4 1 2 2 2 2 2 3 1 1 2 1 1 1 2 2 1
1 1 2 4 1 2 3 3 1 3 2 1 1 1 1 2 1 2 2 1
5 4 5 5 4 5 2 1 5 1 5 5 5 5 4 5 3 5 1 4
4 3 4 4 4 4 2 4 3 3 4 4 3 3 4 3 2 4 3 3
4 3 4 4 4 4 2 2 4 2 4 4 4 4 4 4 2 4 2 3
2 3 1 5 1 1 3 3 2 3 3 4 3 5 1 2 1 3 5 2
3 2 2 5 2 2 3 3 2 3 3 1 3 3 2 2 1 3 3 1
3 2 1 5 1 1 3 3 2 3 3 2 3 4 1 2 1 3 4 1
4 5 5 5 3 5 1 1 5 1 5 5 5 5 4 5 3 3 5 4
2 4 5 3 3 3 5 5 4 4 4 2 2 2 3 5 4 1 4 3
2 4 5 4 3 4 3 3 4 2 4 3 3 3 3 5 3 2 4 3
3 3 3 3 2 4 3 1 2 3 2 1 5 3 2 3 4 2 1 1
3 4 4 3 4 4 4 1 4 5 4 3 5 4 4 4 5 4 4 3
3 2 3 3 3 4 3 2 3 5 3 3 5 3 3 4 4 4 2 2
5 5 4 5 4 4 4 4 2 4 3 4 5 4 4 4 4 4 4 4
5 4 3 4 4 4 4 3 4 4 4 4 4 4 4 3 5 3 3 3
5 4 3 5 4 5 4 4 3 4 4 4 4 4 5 3 4 4 4 4
3 4 5 3 3 5 4 3 2 4 4 4 5 3 4 3 4 3 4 2
3 3 4 3 4 4 4 3 4 4 4 4 4 4 4 4 5 4 4 4
3 3 4 3 3 4 4 3 3 4 4 4 4 3 5 4 4 4 4 3
4 3 3 4 4 4 4 3 4 4 3 2 5 4 4 3 5 3 4 4
4 3 3 4 4 4 4 2 4 4 4 4 4 4 4 3 4 4 3 4
4 3 3 4 4 4 4 3 4 4 4 4 4 4 5 3 4 4 3 4
];
jump_len = 12;
artifacts_photowct = ratings(1:jump_len:end, :);
artifacts_wct2 = ratings(4:jump_len:end, :);
artifacts_xueting = ratings(7:jump_len:end, :);
artifacts_ours = ratings(10:jump_len:end, :);

style_photowct = ratings(2:jump_len:end, :);
style_wct2 = ratings(5:jump_len:end, :);
style_xueting = ratings(8:jump_len:end, :);
style_ours = ratings(11:jump_len:end, :);

overall_photowct = ratings(3:jump_len:end, :);
overall_wct2 = ratings(6:jump_len:end, :);
overall_xueting = ratings(9:jump_len:end, :);
overall_ours = ratings(12:jump_len:end, :);

% compute winners
% artifacts
p = artifacts_photowct(:); 
w = artifacts_wct2(:);
x = artifacts_xueting(:);
o = artifacts_ours(:);
artifacts_performance = [mean(p) mean(w) mean(x) mean(o)]
diff_artifacts_performance = [mean(p) mean(w) mean(x) mean(o)]./max(artifacts_performance)
stdv_artifacts_performance = [std(p) std(w) std(x) std(o)]

% style
p = style_photowct(:); 
w = style_wct2(:);
x = style_xueting(:);
o = style_ours(:);
style_performance = [mean(p) mean(w) mean(x) mean(o)]
diff_style_performance = [mean(p) mean(w) mean(x) mean(o)]./max(style_performance)
stdv_style_performance = [std(p) std(w) std(x) std(o)]


% overall
p = overall_photowct(:); 
w = overall_wct2(:);
x = overall_xueting(:);
o = overall_ours(:);
overall_performance = [mean(p) mean(w) mean(x) mean(o)]
diff_overall_performance = [mean(p) mean(w) mean(x) mean(o)]./max(overall_performance)
stdv_overall_performance = [std(p) std(w) std(x) std(o)]
